# Supplementary material
Source: PubMed Central journal article supplement (PMC2643076)

**Attenuated P2X<sub>7</sub> Pore Function as a Risk Factor for Virus Induced Loss of Asthma  
Control**

Loren C. Denlinger, Lei Shi, Arturo Guadarrama, Kathy Schell, Dawn Green, Alison  
Morrin, Kirk Hogan, Ronald L. Sorkness, William W. Busse, and James E. Gern

**ONLINE DATA SUPPLEMENT**

## SUPPLEMENTAL METHODS

### Recruitment, Entry Criteria and Visit Structure

Participants were recruited from an established database and mass email prior to expected rhinovirus cold seasons (Spring and Fall) with instructions to call the study coordinators within 48 hr of a new upper respiratory tract infection. Inclusion criteria comprised the following: a) age of 18 to 45 years, b) physician diagnosis of asthma based on episodic symptoms of cough, wheeze and dyspnea established at least six months prior to enrollment, c) asthma medications consisting of as needed short acting  $\beta_2$  agonists, low dose inhaled corticosteroids ( $\leq 400$  mcg beclomethasone/day or equivalent), or the combination product Advair® equivalent to low dose inhaled corticosteroids, d) database records of FEV1  $\geq 70\%$  of predicted, e) prior history of FEV1 reversibility with  $\beta_2$  agonist  $\geq 12\%$  or methacholine PC20  $< 8$  mg/ml, and f) skin test reactivity to at least one aeroallergen. Participants were not eligible to participate if they were a current smoker or had a history of  $\geq 5$  pack-yrs, were currently on immunotherapy, or had been enrolled in another clinical study within one month prior to the initial visit. Participants were asked to complete four visits within the first week of cold symptoms, followed by two visits when their cold symptoms returned to baseline at least six weeks later (Table E2).

### Additional Phenotyping Methods

In addition to virus detection in airway samples by multiplex PCR, serum samples for *Chlamydia pneumoniae* and *Mycoplasma pneumoniae* IgM, IgG and IgA detection were collected at one acute and one baseline, stored at  $-80^\circ\text{C}$ , and performed at the end of the study using a ELISA kits according to manufacturers instructions (Savyon Diagnostics, Ashdod, Israel). Spirometry was performed at each visit and a

methacholine challenge was done on the visits corresponding to sputum induction; both of which were performed according to ATS guidelines.

The loss of asthma control is defined as follows. The convalescent baseline respiratory symptoms and medication use for each participant were calculated as the median values for the period of time beginning one week prior to the Visit 7 and extending through Visit 7A (Table E2). Similarly, the mean A.M. peak expiratory flow (PEF) for the same time period was used. The asthma symptom score combined the A.M. and P.M. values for chest tightness, wheeze, and shortness of breath, ranging from 0 to 18. Minor loss of control was defined as an increase in symptom score by at least 4 above the convalescent baseline value for two consecutive days, while not meeting the major criteria. A major loss of control included any of the following measures present on two consecutive days; a decline in PEF by  $\geq 35\%$ , an increase in rescue inhaler use above reference by at least 4 times per day, or greater than eight uses of rescue inhalers per day.

### **P2X<sub>7</sub> Pore Assay and Genotyping**

Briefly, whole blood samples are stained with a phycoerythrin-labeled anti-CD14 antibody and then stimulated with buffer or 250  $\mu\text{M}$  Bz-ATP in the presence of 1  $\mu\text{M}$  YO-PRO-1. With recalled flow cytometer settings, monocytes were detected in the context of whole blood by a CD14<sup>+</sup> threshold flow cytometric technique and the amount of fluorescent-dye uptake (YO-PRO-1) was quantified as the geometric mean. Nonviable cells were excluded from the analysis by gating out YO-PRO-1 positive cells in the buffer control, which conveniently have less intense CD14 expression. These gates are also applied to the Bz-ATP treated samples. Data are reported as the agonist-induced YO-PRO-1 uptake (fold change) by these cells. When pore assay data from an acute and

baseline visit were available from samples processed within 24 hrs, the average of these values was reported.

Genomic DNA was harvested using the PureGene kit and genotyping was performed by restriction fragment length polymorphism analysis of polymerase chain reaction products, as previously described (34). The RefSeq numbers for the genotyped *P2RX7* alleles are as follows: rs2393799, rs28360447 (cDNA—G474A, amino acid G150R), rs28360457 (cDNA—G946A, amino acid— R307Q), rs2230911 (cDNA—C1096G, amino acid—T357S), rs2230912, rs3751143 (cDNA—A1513C, amino acid E496A), and rs1653624 (cDNA--T1729A, amino acid— I568N).

Logistic regression was performed to determine how well  $P2X_7$  activity corresponds with a binomial of the presence or absence of known loss of function genotypes. A receiver-operator curve (ROC) was constructed that determines the threshold of pore activity with the best predictive value for identifying samples with loss of function genotypes, while also excluding those with normal genotypes. The whole blood  $P2X_7$  assay has previously been validated in samples from 200 healthy volunteers with robust identification of previously characterized and novel loss-of-function polymorphisms, with an area under the receiver-operator curve (AUC) of 0.927 (34). The AUC for identifying loss-of-function genotypes in this population is 0.870 ( $p < 0.001$ ), incorporating an allele (*i.e.* G474A) we have previously proposed to confer attenuated function (34).

### **Site Directed Mutagenesis and Recombinant Line Characterization**

To test whether the *P2RX7* 474 A allele is associated with attenuated function (confers an amino acid substitution G150R), we created a point mutant for recombinant expression in HEK293 cells. After confirming similar levels of mRNA and protein expression relative to the wild-type control (not shown), the function of these

recombinant cells was assessed for P2X<sub>7</sub> pore function by the agonist-induced uptake of YO-PRO-1 in a fluorimetric plate assay (Supplementary Figure 1). Briefly, a pcDNA3 expression vector containing a cloned human *P2RX7* cDNA associated with normal pore activity was subjected to point mutagenesis using the Quick Change Kit (Stratagene Inc., La Jolla, CA) to create the variant P2X<sub>7</sub>-G150R. HEK 293 cells were transfected by the Superfect liposomal method and stable populations were selected by G418 resistance. Expression of P2X<sub>7</sub> mRNA and protein in unstimulated transfected HEK cell cultures was verified by RT-PCR and immunoblotting as previously described (E1). Transfected HEK cells were washed in HEPES-buffered saline (HBS; 130 mM NaCl, 5 mM KCl, 20 mM HEPES-pH 7.4, 0.1% BSA, and 10 mM glucose, components from Sigma-Aldrich, St. Louis MO), stimulated for 20 min at room temperature with various concentrations of 2'-3'-O-(4-benzoylbenzoyl)adenosine 5'triphosphate (BzATP, 0 or 1 to 300  $\mu$ M) in the presence of 10  $\mu$ M YO-PRO-1 (Invitrogen, Carlsbad, CA), equilibrated to 10 mM MgCl<sub>2</sub>, and washed again in HBS. YO-PRO-1 fluorescence was measured by a Synergy-HT fluorescent plate reader (BioTek Instruments, Inc., Winooski, VT) using 485  $\pm$  20 nm excitation and 528  $\pm$  20 emission filters. In this assay system, the YO-PRO-1 fluorescence was increased roughly four fold by Bz-ATP stimulation of HEK cells expressing the P2X<sub>7</sub> wild type control with an EC<sub>50</sub> of < 1  $\mu$ M. The control loss-of-function mutant, 496A, had a similar EC<sub>50</sub> but a markedly reduced maximal response. By contrast, the 150R mutant exhibited no agonist stimulated increase in (Figure E1). In this regard, HEK 293 cells stably transfected with a recombinant expression vector containing this point variant have substantially reduced pore function (Figure E1). Collectively, the P2X<sub>7</sub> pore assay in whole blood has very good predictive power for identifying samples with known and novel variant alleles, and can be used as a continuous variable to investigate relationships between the P2X<sub>7</sub> receptor system and disease biomarkers or endpoints.

## **Regression Analysis of the Change in Asthma Symptoms and the Loss of Asthma Control**

Least squares linear regression analysis was used to model normal-transformed univariate factors associated with the change in asthma symptoms during a naturally occurring cold. The methacholine PC<sub>20</sub> and neutrophil counts required a log transformation, whereas pore activity data were normalized using the square root function. A preliminary multivariate model was built by the stepwise method, sequentially entering univariate factors with the next highest F-statistic until the statistical power was depleted. A generalized linear model of the change in asthma symptoms was then used to calculate multivariate coefficient estimates, confidence intervals, and corresponding statistics. In all cases, residual plots of the models had random distributions. For analysis of the loss of asthma control, any loss (minor or major) was categorized in a binomial variable described above. Logistic regression of the loss of control was performed with pore activity as the main dependent variable and the calculation of a crude odds ratio. Adjustment for the detection of virus and the pre-cold use of ICS was then included for an adjusted OR, receiver-operator analysis, and performance assessment of the model.

**References**

- E1. Denlinger, L. C., J. A. Sommer, K. Parker, L. Gudipaty, P. L. Fiset, J. J. Watters, R. A. Proctor, G. R. Dubyak, and P. J. Bertics. 2003. Mutation of a dibasic amino acid motif within the C-terminus of the P2X7 nucleotide receptor results in trafficking defects and impaired function. *J. Immunol* 171:1304-11.
- E2. Gu, B. J., W. Zhang, R. A. Worthington, R. Sluyter, P. Dao-Ung, S. Petrou, J. A. Barden, and J. S. Wiley. 2001. A Glu-496 to Ala polymorphism leads to loss of function of the human P2X7 receptor. *J Biol Chem* 276(14):11135-42.
- E3. Wiley, J. S., L. P. Dao-Ung, C. Li, A. N. Shemon, B. J. Gu, M. L. Smart, S. J. Fuller, J. A. Barden, S. Petrou, and R. Sluyter. 2003. An Ile-568 to Asn polymorphism prevents normal trafficking and function of the human P2X7 receptor. *J Biol Chem* 278(19):17108-13.
- E4. Gu, B. J., R. Sluyter, K. K. Skarratt, A. N. Shemon, L. P. Dao-Ung, S. J. Fuller, J. A. Barden, A. L. Clarke, S. Petrou, and J. S. Wiley. 2004. An Arg307 to Gln polymorphism within the ATP-binding site causes loss of function of the human P2X7 receptor. *J Biol Chem* 279(30):31287-95.
- E5. Shemon, A. N., R. Sluyter, S. L. Fernando, A. L. Clarke, L. P. Dao-Ung, K. K. Skarratt, B. M. Saunders, K. S. Tan, B. J. Gu, S. J. Fuller, W. J. Britton, S. Petrou, and J. S. Wiley. 2006. A Thr357 to Ser polymorphism in homozygous and compound heterozygous subjects causes absent or reduced P2X7 function and impairs ATP-induced mycobacterial killing by macrophages. *J Biol Chem* 281(4):2079-86.

| P2RX7 Genotype |       |        |        |        | Pore Activity | Validated LOF Genotypes |          | Validated + G474A |          |
|----------------|-------|--------|--------|--------|---------------|-------------------------|----------|-------------------|----------|
| G474A          | G946A | C1096G | A1513C | T1729A |               | Sens                    | 1 - Spec | Sens              | 1 - Spec |
| HET            | WT    | WT     | HET    | WT     | 1.0           | 0                       | 0.04     | 0.125             | 0        |
| WT             | WT    | WT     | HET    | HET    | 1.8           | 0.167                   | 0.04     | 0.25              | 0        |
| WT             | WT    | WT     | WT     | WT     | 8.6           | 0.167                   | 0.08     | 0.25              | 0.044    |
| WT             | WT    | HET    | HET    | WT     | 8.9           | 0.333                   | 0.08     | 0.375             | 0.044    |
| WT             | WT    | HET    | HET    | WT     | 9.2           | 0.5                     | 0.08     | 0.5               | 0.044    |
| HET            | WT    | WT     | HET    | WT     | 20.1          | 0.5                     | 0.12     | 0.625             | 0.044    |
| WT             | WT    | WT     | WT     | HET    | 21.9          | 0.667                   | 0.12     | 0.75              | 0.044    |
| WT             | WT    | WT     | HET    | WT     | 24.9          | 0.667                   | 0.16     | 0.75              | 0.087    |
| WT             | WT    | WT     | HET    | WT     | 25.3          | 0.667                   | 0.2      | 0.75              | 0.130    |
| WT             | WT    | WT     | WT     | WT     | 29.2          | 0.667                   | 0.24     | 0.75              | 0.174    |
| WT             | WT    | HET    | WT     | WT     | 34.3          | 0.667                   | 0.28     | 0.75              | 0.217    |
| WT             | WT    | WT     | HET    | WT     | 38.5          | 0.667                   | 0.32     | 0.75              | 0.261    |
| WT             | WT    | WT     | HET    | WT     | 38.7          | 0.667                   | 0.36     | 0.75              | 0.304    |
| WT             | WT    | WT     | HET    | WT     | 39.1          | 0.667                   | 0.4      | 0.75              | 0.348    |
| WT             | WT    | WT     | WT     | HET    | 42.3          | 0.833                   | 0.4      | 0.875             | 0.348    |
| WT             | WT    | WT     | HET    | WT     | 47.3          | 0.833                   | 0.44     | 0.875             | 0.391    |
| WT             | WT    | WT     | WT     | WT     | 49.2          | 0.833                   | 0.48     | 0.875             | 0.435    |
| WT             | WT    | WT     | HET    | WT     | 51.0          | 0.833                   | 0.52     | 0.875             | 0.478    |
| WT             | WT    | WT     | HET    | WT     | 54.9          | 0.833                   | 0.56     | 0.875             | 0.522    |
| WT             | HET   | WT     | WT     | HET    | 55.9          | 1                       | 0.56     | 1                 | 0.522    |
| WT             | WT    | WT     | HET    | WT     | 57.7          | 1                       | 0.6      | 1                 | 0.565    |
| WT             | WT    | WT     | WT     | WT     | 58.3          | 1                       | 0.64     | 1                 | 0.609    |
| WT             | WT    | WT     | WT     | WT     | 63.2          | 1                       | 0.68     | 1                 | 0.652    |
| WT             | WT    | HET    | WT     | WT     | 65.4          | 1                       | 0.72     | 1                 | 0.696    |
| WT             | WT    | WT     | WT     | WT     | 82.6          | 1                       | 0.76     | 1                 | 0.739    |
| WT             | WT    | WT     | WT     | WT     | 98.8          | 1                       | 0.8      | 1                 | 0.783    |
| WT             | WT    | WT     | WT     | WT     | 104.2         | 1                       | 0.84     | 1                 | 0.826    |
| WT             | WT    | WT     | WT     | WT     | 108.8         | 1                       | 0.88     | 1                 | 0.87     |
| WT             | WT    | WT     | WT     | WT     | 110.2         | 1                       | 0.92     | 1                 | 0.913    |
| WT             | WT    | WT     | WT     | WT     | 122.9         | 1                       | 0.96     | 1                 | 0.956    |
| WT             | WT    | WT     | WT     | WT     | 133.7         | 1                       | 1        | 1                 | 1        |

**Table E1. Performance analysis of pore function to identify samples with loss of function**

**genotypes.** Genotypes and pore activities were assessed on all samples in the present study using procedures described in the Methods Section. Previously validated loss of function genotypes (1513 CC, 1729 TA, 946 GA, 1513 AC-1096 CG) are shaded (E2-E5). The 474 GA genotype has also been associated with low pore function in healthy participants ((34), please also refer to Figure E1 for functional data in a recombinant expression system). Calculations are shown for the sensitivities and



specificities at varying thresholds of pore function to identify loss of function genotypes using the validated alleles without and with G474A. Logistic regression with a receiver-operator analysis has an area under the curve of 0.797 and 0.870 ( $p = 0.012$  and  $< 0.001$ ) respectively. The optimal threshold is  $< 22$ -fold of BzATP-induced YO-PRO-1 uptake, indicated by the highest Jaeger statistic (sensitivity – (1 – specificity)). This threshold of pore activity corresponded with a YO-PRO-1 median fluorescence intensity of approximately 675 arbitrary fluorescence units in the BzATP-stimulated whole blood samples. The positive predictive values are 0.571 and 0.857 for the two models respectively. In both cases, the negative predictive value is 0.917.

|                                                          | ACUTE INFECTION |                     |                      |                | RECOVERY        |                 |                 | POST COLD BASELINE |                  |
|----------------------------------------------------------|-----------------|---------------------|----------------------|----------------|-----------------|-----------------|-----------------|--------------------|------------------|
|                                                          | Visit 1         | Visit 1a            | Visit 2*             | Visit 3        | (Visit 4)       | (Visit 5)       | (Visit 6)       | Visit 7            | Visit 7a*        |
|                                                          |                 | 24-48 hours post V1 | 24-48 hours post V1a | 7 days post V1 | 14 days post V1 | 21 days post V1 | 28 days post V1 | 6 weeks post V1    | 24 hours post V7 |
| Medical & asthma history                                 | X               |                     |                      |                |                 |                 |                 |                    |                  |
| Issue diary cards (asthma and cold sx)& peak flow meters | X               |                     |                      |                |                 |                 |                 |                    |                  |
| Cold Symptom Assessment                                  | X               |                     |                      |                |                 |                 |                 |                    |                  |
| Physical examination                                     | (X)             | (X)                 | X                    |                |                 |                 |                 |                    | X                |
| Monitor peak flow rates                                  |                 | X                   | X                    | X              | X               | X               | X               | X                  |                  |
| Check diary cards & assess AE                            |                 | X                   | X                    | X              | X               | X               | X               | X                  |                  |
| Nasal lavage                                             | X               | X                   | X                    | X              | X               | X               | X               | X                  |                  |
| Sputum induction                                         |                 | X                   |                      | X              | X               | X               | X               | X                  |                  |
| Spirometry                                               | X               | X                   | X                    | X              | X               | X               | X               | X                  | X                |
| Methacholine challenge                                   |                 | X                   |                      | X              |                 |                 |                 | X                  |                  |
| Blood for P2X7 Pore Assay                                | (X)             |                     |                      |                |                 |                 |                 |                    | X                |

**Table E2. Visit structure and data collection.** Patients with asthma were enrolled at the start of an upper respiratory tract infection according to the entry criteria in the text. Items enclosed by parentheses were optional.

PEAK FLOW AND SYMPTOM DIARY CARD

Participant ID: \_\_\_\_\_

If your asthma worsens, please call \_\_\_\_\_ at ( \_\_\_\_\_ ) \_\_\_\_\_

Date and time of next study visit: \_\_\_\_\_

Score each asthma symptom as follows: 0=not present, 1=mild, 2=moderate, 3=severe.

| Date<br>(month/day/year) | Number of puffs of albuterol you used in the past 24 hours | Number of times you woke up at night and required albuterol | Peak Exp. Flow Rate | Chest Tightness       | Wheeze                | Cough                 | Shortness of Breath   | Peak Expiratory Flow Rate | Chest Tightness       | Wheeze                | Cough                 | Shortness of Breath   | Comments:<br><br>• Medical problems<br>• Medications taken (other than albuterol) |
|--------------------------|------------------------------------------------------------|-------------------------------------------------------------|---------------------|-----------------------|-----------------------|-----------------------|-----------------------|---------------------------|-----------------------|-----------------------|-----------------------|-----------------------|-----------------------------------------------------------------------------------|
|                          | AM                                                         | AM                                                          | AM                  | AM                    | AM                    | AM                    | AM                    | PM                        | PM                    | PM                    | PM                    | PM                    |                                                                                   |
|                          |                                                            |                                                             |                     | Circle one<br>0 1 2 3 |                           | Circle one<br>0 1 2 3 |                                                                                   |
|                          |                                                            |                                                             |                     | 0 1 2 3               | 0 1 2 3               | 0 1 2 3               | 0 1 2 3               |                           | 0 1 2 3               | 0 1 2 3               | 0 1 2 3               | 0 1 2 3               |                                                                                   |
|                          |                                                            |                                                             |                     | 0 1 2 3               | 0 1 2 3               | 0 1 2 3               | 0 1 2 3               |                           | 0 1 2 3               | 0 1 2 3               | 0 1 2 3               | 0 1 2 3               |                                                                                   |
|                          |                                                            |                                                             |                     | 0 1 2 3               | 0 1 2 3               | 0 1 2 3               | 0 1 2 3               |                           | 0 1 2 3               | 0 1 2 3               | 0 1 2 3               | 0 1 2 3               |                                                                                   |
|                          |                                                            |                                                             |                     | 0 1 2 3               | 0 1 2 3               | 0 1 2 3               | 0 1 2 3               |                           | 0 1 2 3               | 0 1 2 3               | 0 1 2 3               | 0 1 2 3               |                                                                                   |

Table E3. Asthma symptom and peak flow diary used for this study. Shaded areas are nighttime values.

| Pore Activity | Baseline ICS | RV detected | Loss of Control | Nasal Lavage Neutrophil Counts (10e6/mL) |        |        |        |       |       |        | Average Baseline |
|---------------|--------------|-------------|-----------------|------------------------------------------|--------|--------|--------|-------|-------|--------|------------------|
|               |              |             |                 | Peak                                     | V1     | V1a    | V2     | V3    | V4/7  | V4a/7a |                  |
| 1             | No           | No          | Yes             | 1.709                                    | 1.709  | 0.093  | 0.048  | 0.136 | 0.043 |        | 0.043            |
| 1.8           | No           | No          | Yes             | 0.029                                    | 0.023  | 0.017  | 0.029  | 0.009 | 0.004 |        | 0.004            |
| 8.6           | No           | No          | No              | 0.406                                    | 0.380  | 0.08   | 0.068  | 0.046 |       | 0.406  | 0.406            |
| 8.9           | No           | No          | Yes             | 0.198                                    | 0.029  | 0.198  | 0.023  | 0.183 |       | 0.045  | 0.045            |
| 9.2           | No           | Yes         | Yes             | 0.071                                    | 0.007  | 0.035  | 0.071  | 0.009 | 0.059 | 0.047  | 0.053            |
| 20.1          | No           | No          | Yes             | 1.367                                    | 0.722  | 0.3    | 1.367  | 0.175 | 0.319 | 0.107  | 0.213            |
| 21.9          | No           | No          | Yes             | 3.609                                    | 3.609  | 0.535  | 1.1    | 2.962 |       | 0.175  | 0.175            |
| 24.9          | Yes          | Yes         | Yes             | 0.192                                    | 0.095  | 0.192  | 0.067  | 0.108 |       | 0.029  | 0.029            |
| 25.3          | No           | Yes         | Yes             | 0.107                                    | 0.069  | 0.027  | 0.107  | 0.04  | 0.008 | 0.009  | 0.009            |
| 29.2          | No           | No          | No              | 0.038                                    | 0.007  | 0.004  | 0.01   | 0.002 | 0.017 | 0.038  | 0.028            |
| 34.3          | No           | No          | Yes             | 0.268                                    | 0.268  | 0.019  | 0.069  | 0.04  | 0.166 | 0.07   | 0.118            |
| 38.5          | No           | No          | No              | 1.563                                    | 0.088  | 0.027  | 0.463  |       | 1.563 | 0.096  | 0.83             |
| 38.7          | No           | Yes         | Yes             | 3.964                                    | 0.028  | 0.463  | 0.072  | 3.964 |       | 0.004  | 0.004            |
| 39.1          | No           | Yes         | No              | 4.468                                    | 4.468  | 0.281  | 0.089  | 0.029 | 0.043 |        | 0.043            |
| 42.3          | No           | No          | No              | 59.555                                   | 2.074  | 59.555 | 30.353 | 1.205 | 0.115 | 0.04   | 0.077            |
| 47.3          | No           | Yes         | Yes             | 24.857                                   | 24.857 | 0.356  | 0.992  | 0.261 | 0.111 | 0.086  | 0.099            |
| 49.2          | Yes          | Yes         | Yes             | 0.023                                    | 0.001  | 0.023  |        | 0.009 |       | 0.001  | 0.001            |
| 51            | No           | Yes         | No              | 19.829                                   | 19.829 | 16.13  | 1.431  | 1.359 | 0.505 |        | 0.505            |
| 55.9          | No           | No          | Yes             | 0.238                                    | 0.004  | 0.003  | 0.02   | 0.238 | 0.036 |        | 0.036            |
| 57.7          | No           | Yes         | No              | 0.353                                    | 0.010  | 0.049  | 0.162  | 0.211 | 0.098 | 0.353  | 0.225            |
| 58.3          | No           | Yes         | No              | 22.501                                   | 0.156  | 22.501 | 4.16   | 4.17  | 0.518 | 16.422 | 8.47             |
| 63.2          | No           | Yes         | Yes             | 9.843                                    | 2.880  | 9.843  | 0.666  | 7.425 | 0.01  | 0.97   | 0.49             |
| 65.4          | Yes          | Yes         | Yes             | 3.809                                    | 3.809  | 0.045  | 0.039  | 0.139 | 0.344 | 0.318  | 0.331            |
| 82.6          | No           | Yes         | No              | 29.49                                    | 0.212  | 0.278  | 27.244 | 29.49 | 0.013 |        | 0.013            |
| 104.2         | No           | Yes         | Yes             | 1.141                                    | 0.166  | 1.141  | 0.029  | 0.187 | 0.099 | 0.107  | 0.103            |
| 108.8         | No           | No          | No              | 2.092                                    | 1.717  | 2.092  | 0.568  | 0.089 |       | 0.068  | 0.068            |
| 122.9         | No           | No          | No              | 9.898                                    | 5.099  | 9.898  | 0.408  | 0.223 | 1.569 | 9.054  | 5.311            |
| 133.7         | No           | No          | No              | 14.054                                   | 2.216  | 12.259 | 14.054 | 0.549 | 0.32  | 0.971  | 0.645            |

**Table E4. Predictors of loss of asthma control during an acute cold, and the nasal lavage neutrophil counts stratified by study visit.** The 28 subjects with complete pore function and clinical data used for the models described in the Results section and Figure 3 are tabulated here. Pore activity reflects the fold of Bz-ATP induced YO-PRO-1 uptake in whole blood monocytes relative to the saline control. Prior to logistic regression analysis of the loss of asthma control, pore function data must be adjusted by the

square root transformation to achieve a normal distribution. Neutrophil counts in the nasal lavage fluid are also displayed according to study visit, however, these were not predictive of the loss of asthma control.

**Figure E1.** The P2X<sub>7</sub>-150R variant (encoded by the 474A allele) was recombinantly expressed in HEK 293 cells along with controls with similar levels of mRNA and protein (not shown). Cells were stimulated with potassium glutamate containing varying concentrations of BzATP and 10 μM YO-PRO-1 for 20 min before the addition of 10 mM MgCl<sub>2</sub> to close the pore, followed by plate reader fluorescence detection. A representative of two experiments is shown with each data point reflective of the mean ± 50% of the range of duplicate measurements.

Figure E1

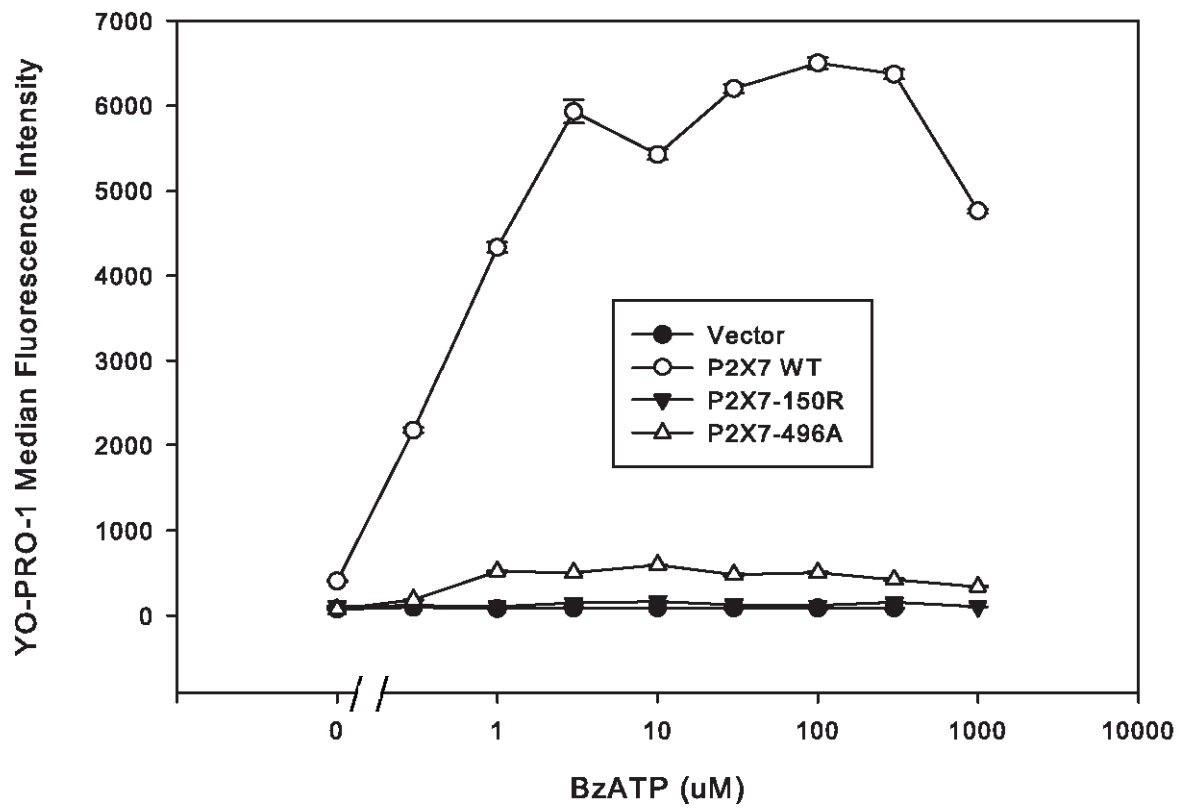

Supplement: supp_179_4_265__1.pdf [file supp_179_4_265__1.pdf]
